# Supplementary material
Source: publisher figshare collection journal article supplement (https://tandf.figshare.com/ndownloader/files/16263503)
Supplement: Supplementary file 1 [file 16263503]

| **Species** | **Station** | **Locality** | **Geographic coordinates** | **Notes** | **GeneBank accession Nr.** |
| --- | --- | --- | --- | --- | --- |
| *Ceramium derbesii* | St. 3 | Alberoni dyke, Lido of Venice | 45°20'8.35"N; 12°20'14.16"E | Epilithic, -1m | LS990783 |
| St. 6 | San Nicolò dyke, Lido of Venice | 45°25'21.87"N; 12°25'10.86"E | Epilithic, -2m | LS990784 |
| *Ceramium nudiusculum* | St. 1 | Ca’ Roman, Pellestrina | 45°14'26.88"N; 12°17'24.56"E | Epiphytic on *Zostera marina* | LS990786 |
| St. 3 | Alberoni dyke, Lido of Venice | 45°20'8.35"N; 12°20'14.16"E | Epilithic, -1m | LS990787 |
| St. 5 | Murazzi, Lido of Venice | 45°23'35.22"N; 12°21'31.23"E | Epilithic, -2m | LS990788 |
| St. 6 | San Nicolò dyke, Lido of Venice | 45°25'21.87"N; 12°25'10.86"E | Epilithic, -2m | LS990789 |
| *Ceramium* sp. #1 | St. 1 | Ca’ Roman, Pellestrina | 45°14'26.88"N; 12°17'24.56"E | Epiphytic on *Zostera marina* | LR031254 |
| *Ceramium* sp. #2 | St. 1 | Ca’ Roman, Pellestrina | 45°14'26.88"N; 12°17'24.56"E | Epiphytic on *Zostera marina* | LR031258 |
| St. 2 | Santa Maria del Mare, Pellestrina | 45°19'56.00"N; 12°19'2.89"E | Epiphytic on *Zostera marina* | LR031259 |
| St. 4 | Torson di Sotto, Venice | 45°20'55.81"N; 12°14'56.63"E | Epiphytic on *Zostera marina* | LR031260 |
| *Ceramium* sp. #3 | St. 1 | Ca’ Roman, Pellestrina | 45°14'26.88"N; 12°17'24.56"E | Epiphytic on *Zostera marina* | LR031256 |
| St. 4 | Torson di Sotto, Venice | 45°20'55.81"N; 12°14'56.63"E | Epiphytic on *Zostera marina* | LR031257 |
| *Ceramium* sp. #4 | St. 3 | Alberoni dyke, Lido of Venice | 45°20'8.35"N; 12°20'14.16"E | Epilithic, -2m | LR031255 |

Table 1. Collection information and GenBank accession numbers of the *rbc*L sequences corresponding to the taxonomic entities identified in this study.
